# Supplementary material
Source: HighWire-hosted journal article supplement (https://jnm.snmjournals.org/highwire/filestream/94711/field_highwire_adjunct_files/0/115097_Supplemental_Data.pdf)
Supplement: 115097_Supplemental_Data.pdf [file 115097_Supplemental_Data.pdf]

**Supplemental Table 1. A Sample Weight-Based Dosing for <sup>99m</sup>Tc-Sestamibi MPI Using a Dedicated Cardiac SPECT Scanner**

| <b>Weight range</b> | <b>Rest dose (mCi)</b> | <b>Rest dose (MBq)</b> | <b>mSv</b> | <b>Stress dose (mCi)</b> | <b>Stress dose (MBq)</b> | <b>mSv</b> | <b>Total mSv (rest + stress)</b> |
|---------------------|------------------------|------------------------|------------|--------------------------|--------------------------|------------|----------------------------------|
| <b>&lt;175 lbs</b>  | 3.00                   | 111.00                 | 0.88       | 9.00                     | 333.00                   | 3.00       | 3.87                             |
| <b>176-200 lbs</b>  | 3.50                   | 129.50                 | 1.02       | 10.50                    | 388.50                   | 3.50       | 4.52                             |
| <b>200-225 lbs</b>  | 4.00                   | 148.00                 | 1.17       | 12.00                    | 444.00                   | 4.00       | 5.17                             |
| <b>226-250 lbs</b>  | 4.50                   | 166.50                 | 1.32       | 13.50                    | 499.50                   | 4.50       | 5.81                             |
| <b>250-275 lbs</b>  | 5.00                   | 185.00                 | 1.46       | 15.00                    | 555.00                   | 5.00       | 6.46                             |
| <b>275-300 lbs</b>  | 5.50                   | 203.50                 | 1.61       | 16.50                    | 610.50                   | 5.49       | 7.10                             |
| <b>300-325 lbs</b>  | 6.00                   | 222.00                 | 1.75       | 18.00                    | 666.00                   | 5.99       | 7.75                             |
| <b>325-350 lbs</b>  | 6.50                   | 240.50                 | 1.90       | 19.50                    | 721.50                   | 6.49       | 8.39                             |
| <b>350-375 lbs</b>  | 7.00                   | 259.00                 | 2.05       | 21.00                    | 777.00                   | 6.99       | 9.04                             |
| <b>375-400 lbs</b>  | 7.50                   | 277.50                 | 2.19       | 22.50                    | 832.50                   | 7.49       | 9.68                             |
| <b>&gt;400 lbs</b>  | 25.00                  | 925.00                 | 7.31       | 25.00                    | 925.00                   | 8.33       | 15.63                            |

Marcassa et al. (1) suggest a dose of 8 mBq/kg <sup>99m</sup>Tc radiotracers.

**Supplemental Table 2. Advantages and Challenges of Stress-First (Stress-Only) MPI (2,3)**

| <b>Advantages</b>                                                              |
|--------------------------------------------------------------------------------|
| 1. Lower radiotracer dose per patient                                          |
| 2. Faster laboratory throughput for patient                                    |
| 3. Radiotracer cost savings                                                    |
| 4. Reduced occupation radiation dose                                           |
| 5. Less workload for the laboratory                                            |
| 6. Helpful at times of <sup>99m</sup> Tc shortage                              |
| <b>Challenges</b>                                                              |
| 1. Laboratory schedule is disrupted due to uncertainty of number of scans      |
| 2. Screening patients ahead of time                                            |
| 3. Not helpful in subjects with prior MI or intermediate- to high-risk disease |
| 4. Availability of attenuation correction                                      |
| 5. Disruptive to physician schedule—need real-time scan interpretation         |
| 6. Definitive scan interpretation (normal or abnormal) is required             |
| 7. A lack of knowledge/experience on using stress-first imaging                |
| 8. Lower reimbursement, a disincentive                                         |
| 9. Transient ischemic dilation cannot be evaluated                             |

**Supplemental Table 3. Identifying Suitable Patients for Stress-First Imaging Based on Pretest Likelihood of CAD (4)**

| Age (Yrs)       | Nonanginal pain |       | Atypical angina |       | Typical angina |       |
|-----------------|-----------------|-------|-----------------|-------|----------------|-------|
|                 | Men             | Women | Men             | Women | Men            | Women |
| <b>30 to 39</b> | 4               | 2     | 34              | 12    | 76             | 26    |
| <b>40 to 49</b> | 13              | 3     | 51              | 22    | 87             | 55    |
| <b>50 to 59</b> | 20              | 7     | 65              | 31    | 93             | 73    |
| <b>60 to 69</b> | 27              | 14    | 72              | 51    | 94             | 86    |

Characterize chest pain using three questions. Is the pain (1) substernal (2) exertional (3) relieved by rest or nitroglycerin. Based on the responses, chest pain is characterized as nonanginal (1/3 questions answered yes), atypical angina (2/3 questions answered yes), or typical angina (if 3/3 questions are answered yes). Although the definitions vary, typically, a pretest probability of CAD of 1%–15% is considered low; 16%–85% is considered intermediate, and >85% is considered high-risk. Patients with an intermediate pretest likelihood (16%–85%) are considered appropriate for a stress-first MPI.

**Supplemental Table 4. Approaches to Reducing Radiation Dose from CT in Hybrid MPI (5)**

|                                                                                                                                                                                                                                                                                                                                                                                  |
|----------------------------------------------------------------------------------------------------------------------------------------------------------------------------------------------------------------------------------------------------------------------------------------------------------------------------------------------------------------------------------|
| 1. Use a very low-dose (10 mA, 120 kVP) and a fast-pitch CT scan for attenuation correction                                                                                                                                                                                                                                                                                      |
| 2. Use a single CTAC study whenever possible                                                                                                                                                                                                                                                                                                                                     |
| 3. Limit the CT field of view to match the MPI field of view                                                                                                                                                                                                                                                                                                                     |
| 4. Use advanced dose reduction techniques for calcium score or CT-based coronary angiography <ol style="list-style-type: none"><li>a. Heart rate control</li><li>b. Limit scan range</li><li>c. Prospective ECG-triggered axial/helical scan</li><li>d. Increase scan pitch</li><li>e. Adjust kV for BMI (80–120)</li><li>f. Novel software (iterative reconstruction)</li></ol> |
| 5. Use CTAC scan to evaluate for coronary calcification or use the gated calcium score CT scan for attenuation correction of MPI (minimize use of CTAC and calcium score)                                                                                                                                                                                                        |

**Supplemental Table 5. Prognostic Value of Stress-Only SPECT MPI**

| First author                   | Modality         | Year | Mean FU (months) | Age (yrs) | Number | Endpoint                              | Event rate/yr |
|--------------------------------|------------------|------|------------------|-----------|--------|---------------------------------------|---------------|
| <b>Gal (6)</b>                 | SPECT            | 1996 | 12.2             | 55±14     | 116    | Cardiac death or non-fatal MI         | 0%            |
| <b>Gibson (7)</b>              | SPECT, AC        | 2002 | 26.4             | 52±13     | 729    | Death, non-fatal MI, angiographic CAD | 0.6%          |
| <b>Duvall(8)</b>               | SPECT, AC        | 2010 | 40               | 54±14     | 1,673  | All-cause mortality                   | 2.7%          |
| <b>Chang (9)</b>               | SPECT, AC        | 2010 | 57               | 60±13     | 8,034  | All-cause mortality                   | 2.5%          |
| <b>Ueyama (10)</b>             | SPECT            | 2012 | 41.7             | 67±10     | 726    |                                       | 1.57%*        |
| <b>Ferreira (11)</b>           | SPECT            | 2013 | 42.8             | 63±12     | 790    | Composite end point                   | 4%            |
| <b>Duvall (12)<sup>‡</sup></b> | SPECT, new SPECT | 2012 | 23.3             | 65±13     | 716    | All-cause mortality                   | 5.7%          |
| <b>Mathur (13)</b>             | SPECT, AC        | 2013 | 25               | 54±12     | 1,383  | Cardiac death or non-fatal MI         | 0.7%          |
| <b>Kaminek (14)</b>            | SPECT            | 2014 | 38.4             | 59±9      | 259    | Cardiac death or non-fatal MI         | 0.6%          |

<sup>‡</sup><sup>201</sup>Thallium, all other studies <sup>99m</sup>Tc.

\*All-cause mortality.

Composite = cardiac death or non-fatal MI, coronary revascularization.

## References:

1. Marcassa C, Zoccarato O, Calza P, Campini R. Temporal evolution of administered activity in cardiac gated SPECT and patients' effective dose: analysis of an historical series. *Eur J Nucl Med Mol Imaging*. 2013;40:325-330.
2. Gowd BM, Heller GV, Parker MW. Stress-only SPECT myocardial perfusion imaging: a review. *J Nucl Cardiol*. 2014;21:1200-1212.
3. Mahmarian JJ. Stress only myocardial perfusion imaging: is it time for a change? *J Nucl Cardiol*. 2010;17:529-535.
4. Gibbons RJ, Chatterjee K, Daley J, et al. ACC/AHA/ACP-ASIM guidelines for the management of patients with chronic stable angina: a report of the American College of Cardiology/American Heart Association Task Force on Practice Guidelines (Committee on Management of Patients with Chronic Stable Angina). *J Am Coll Cardiol*. 1999;33:2092-2197.
5. Dorbala S, Di Carli MF, Delbeke D, et al. SNMMI/ASNC/SCCT guideline for cardiac SPECT/CT and PET/CT 1.0. *J Nucl Med*. 2013;54:1485-1507.
6. Gal R, Ahmad M. Cost-saving approach to normal technetium-99m sestamibi myocardial perfusion scan. *Am J Cardiol*. 1996;78:1047-1049.
7. Gibson PB, Demus D, Noto R, Hudson W, Johnson LL. Low event rate for stress-only perfusion imaging in patients evaluated for chest pain. *J Am Coll Cardiol*. 2002;39:999-1004.
8. Duvall WL, Croft LB, Godiwala T, Ginsberg E, George T, Henzlova MJ. Reduced isotope dose with rapid SPECT MPI imaging: initial experience with a CZT SPECT camera. *J Nucl Cardiol*. 2010;17:1009-1014.
9. Chang SM, Nabi F, Xu J, Raza U, Mahmarian JJ. Normal stress-only versus standard stress/rest myocardial perfusion imaging: similar patient mortality with reduced radiation exposure. *J Am Coll Cardiol*. 2010;55:221-230.
10. Ueyama T, Takehana K, Maeba H, Iwasaka T. Prognostic value of normal stress-only technetium-99m myocardial perfusion imaging protocol: comparison with standard stress-rest protocol. *Circ J*. 2012;76:2386-2391.
11. Ferreira MJ, Cunha MJ, Albuquerque A, et al. Prognosis of normal stress-only gated-SPECT myocardial perfusion imaging: a single center study. *Int J Cardiovasc Imaging*. 2013;29:1639-1644.
12. Duvall WL, Wijetunga MN, Klein TM, et al. The prognosis of a normal stress-only Tc-99m myocardial perfusion imaging study. *J Nucl Cardiol*. 2010;17:370-377.
13. Mathur S, Heller GV, Bateman TM, et al. Clinical value of stress-only Tc-99m SPECT imaging: importance of attenuation correction. *J Nucl Cardiol*. 2013;20:27-37.
14. Kaminek M, Metelkova I, Budikova M, et al. Prognostic value of stress-only and stress-rest normal gated SPECT imaging: higher incidence of cardiac hard events in diabetic patients who underwent full stress-rest imaging. *Biomed Pap Med Fac Univ Palacky Olomouc Czech Repub*. May 30, 2014 [Epub ahead of print].
